# Supplementary material
Source: PubMed Central journal article supplement (PMC8092892)
Supplement: AAC.02631-20-s000S1.pdf [file AAC.02631-20-s000S1.pdf]

## Supplementary tables

| Reference MIC range                | MI   | ME   | VME  |
|------------------------------------|------|------|------|
| $\geq I + 2$<br>Or<br>$\geq R + 1$ | < 2% | ND   | <5%  |
| I+1 to I-1<br>Or<br>R + S          | <40% | <10% | <10% |
| $\leq I - 2$<br>Or<br>$\leq S - 1$ | ND   | < 2% | <5%  |

**Table S1. Error rate-bound method acceptance limits according to CLSI M23.** Errors rates for SXT (no intermediate MIC category) parsed as follows:  $\geq R+1$ , MIC greater than or equal to 1 doubling dilution of the resistant breakpoint; R + S, MIC at susceptible or resistant breakpoint; and  $\leq S-1$ , MIC less than or equal to 1 doubling dilution of the susceptible breakpoint. Errors rates for LEV (intermediate MIC category) parsed as follows:  $\geq I+2$ , MIC greater than or equal to 2 doubling dilutions of the intermediate breakpoint; I +/- , MIC plus or minus 1 doubling dilution of the intermediate breakpoint; and  $\leq I-2$ , MIC less than or equal to 2 doubling dilutions of the intermediate breakpoint.

| Etest | CA               | Total MI        | I by reference, S by test | S by reference, I by test | I by reference, R by test | R by reference, I by test |
|-------|------------------|-----------------|---------------------------|---------------------------|---------------------------|---------------------------|
| LEV   | 85%<br>(93/109)  | 16%<br>(17/109) | 1%<br>(1/109)             | 6%<br>(9/109)             | 6%<br>(7/109)             | -                         |
| MIN   | 93%<br>(101/109) | 7%<br>(8/109)   | -                         | 7%<br>(8/109)             | -                         | -                         |
| CAZ   | 71%<br>(77/109)  | 15%<br>(16/109) | 8%<br>(9/109)             | 2%<br>(2/109)             | 2%<br>(2/109)             | 3%<br>(3/109)             |

| MTS | CA               | Total MI         | I by reference, S by test | S by reference, I by test | I by reference, R by test | R by reference, I by test |
|-----|------------------|------------------|---------------------------|---------------------------|---------------------------|---------------------------|
| SXT | 98%<br>(107/109) | 1%<br>(1/109)    | -                         | 1%<br>(1/109)             | -                         | -                         |
| LEV | 82%<br>(89/109)  | 15 %<br>(16/109) | 3%<br>(3/109)             | 7%<br>(8/109)             | 2%<br>(2/109)             | 3%<br>(3/109)             |
| MIN | 99%<br>(108/109) | 1%<br>(1/109)    | -                         | 1%<br>(1/109)             | -                         | -                         |
| CAZ | 73%<br>(80/109)  | 17%<br>(19/109)  | 5%<br>(5/109)             | 6%<br>(6/109)             | 2%<br>(2/109)             | 6%<br>(6/109)             |

**Table S2. Rates of categorical agreement (CA) and stratified minor error (MI) on MIC values determined by the E-test and MTS gradient strips relative to BMD and categorized under CLSI breakpoints (M100). Minor error is parsed into four sub-categories. Susceptible (S), Intermediate (I) and Resistant (R).**
